# Supplementary material for: Drosophila adult muscle precursor cells contribute to motor axon pathfinding and proper innervation of embryonic muscles
Source: Oxford University Press journal article supplement (doi:10.1242/dev.183004), 2020-01-01
Supplement: dev183004supp.pdf [file dev183004supp.pdf]

## Supplemental Information

Figure S1

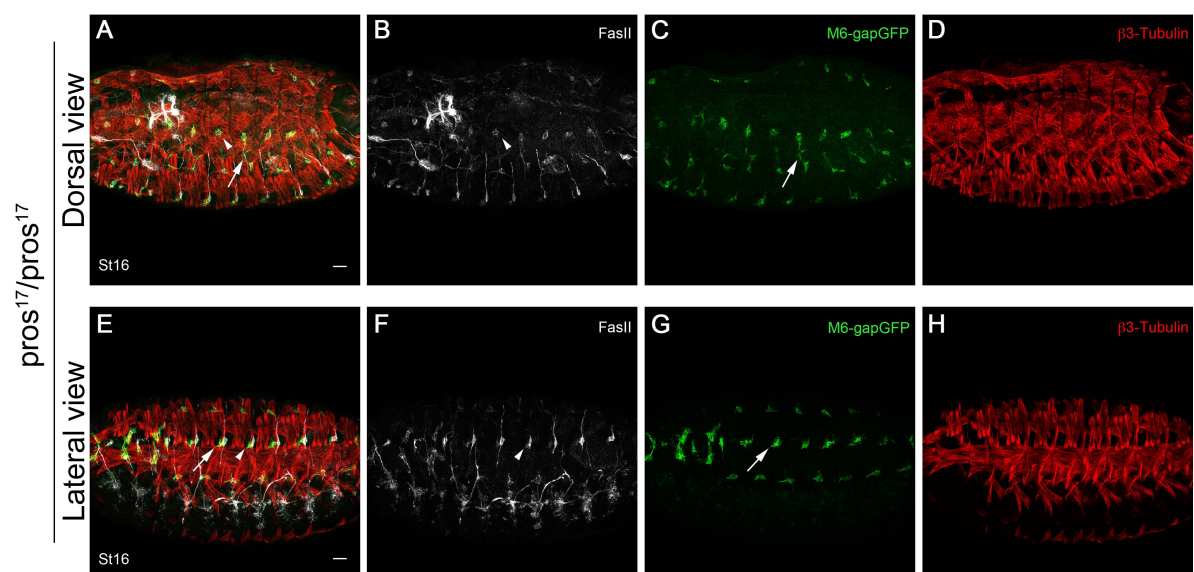

**Figure S1. Motor axons are not necessary for behavior of embryonic AMPs.** Dorsal view (A-D) and lateral view (E-H) of stage 16 *prospero* mutants combined with the M6-gapGFP sensor. In this context motor axons do not exit the CNS properly leaving only a minor extension toward the most ventral muscles, and the Fas2 positive extension of the LBD in the dorsal region. White arrows point toward the unaffected migration of DL-AMPs (C) and L-AMPs (G). Arrowheads highlight the Fas2 expression associated with AMP cells (B, F). Scale bars represent 20  $\mu$ m.

Figure S2

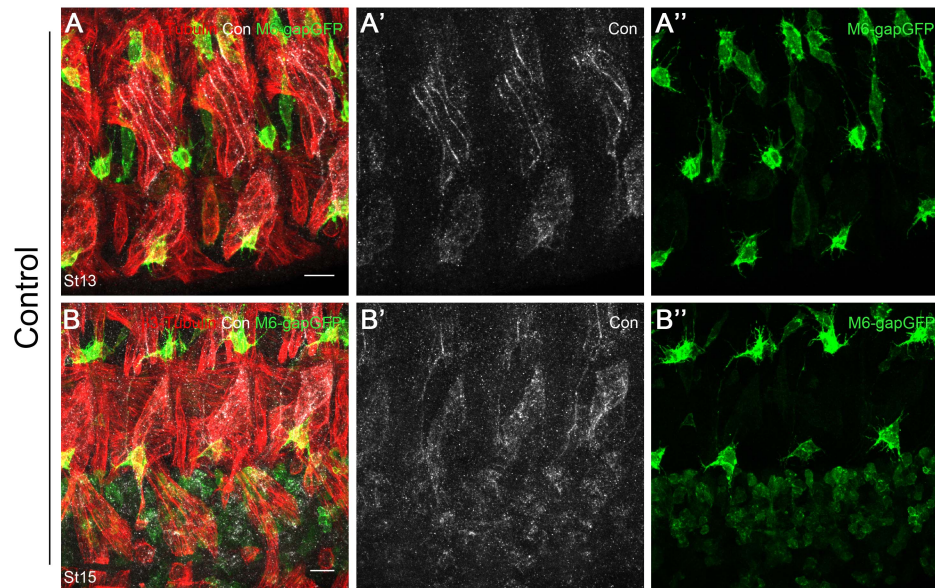

**Figure S2. L-AMPs do not express the cell adhesion molecule Connectin.** Ventrolateral view of stage 13 (A-D) and stage 16 (E-H) M6-gapGFP embryos stained with anti-Connectin. Connectin expression is observed in lateral and ventral acute muscles, and in some cells in the CNS. AMPs are Connectin-negative. Scale bars represent 10  $\mu$ m.

Figure S3

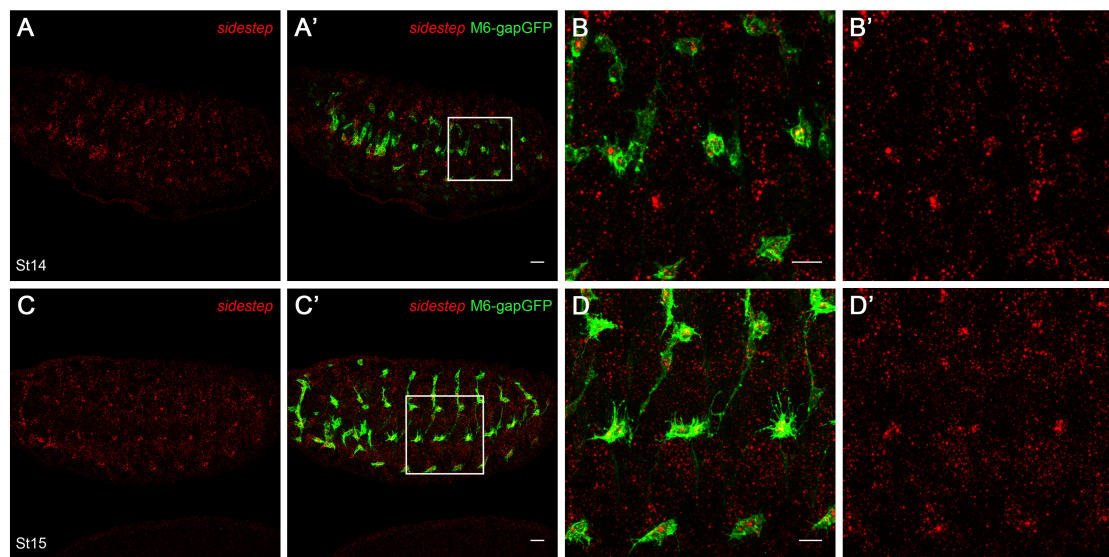

**Figure S3. Embryonic *sidestep* expression in AMPs.** (A-D') Fluorescent *in situ* hybridization (red) of *sidestep* in a stage early 14 (A-B') and 15 (C-D') M6-gapGFP embryos. As shown in the zoomed views (B,B',D,D') *sidestep* transcripts are particularly enriched in DL-AMPs, L-AMPs and V-AMPs. Notice that in stage 14 embryos *side* expression is also detected in a dorsally located cluster of cells, presumably sensory neurons. Scale bars represent 20  $\mu$ m and 10  $\mu$ m for the zoomed view.

Figure S4

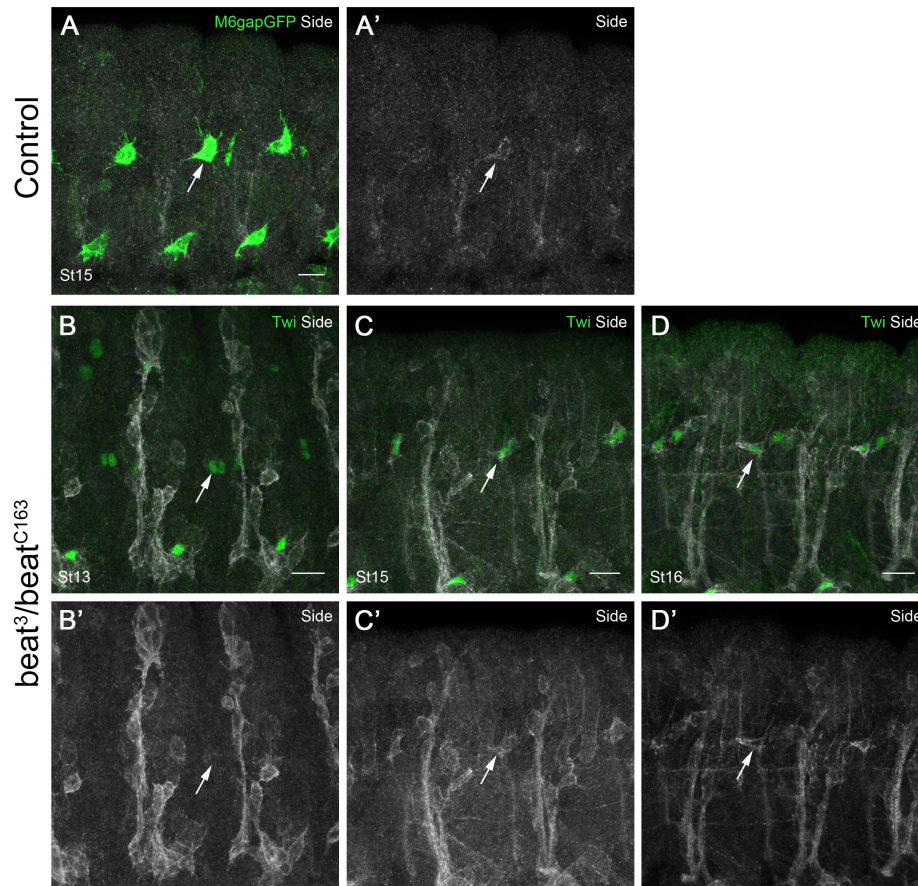

**Figure S4. L-AMPs transiently express the guidance molecule Sidestep.** (A,A') Zoomed lateral view of a M6-gapGFP stage 15 embryo. Immunostaining with the anti-Sidestep antibody reveals a weak expression in L-AMPs (white arrows). (B-D') In *beat-1a* mutant embryo Sidestep expression appears higher in Sidestep-positive cells. At stage 13 L-AMPs are Sidestep-negative (B,B'). Increased Sidestep expression in L-AMPs could be detected at stage 15 (C,C') and persists in the anterior L-AMP in stage 16 *beat-1a* mutant embryos (D,D'). Scale bars represent 10  $\mu$ m.



Figure S5

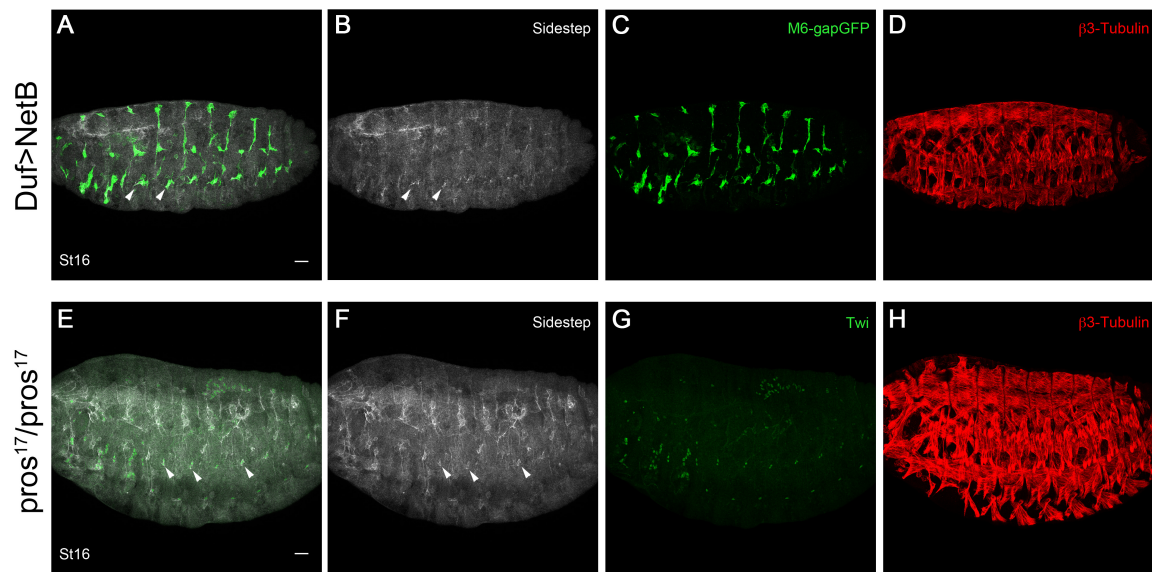

**Figure S5. Sidestep expression in L-AMPs in different genetic contexts affecting the SNa. (A-D)** Lateral view of stage 16 *DUF>NetB* embryo combined with the M6-gapGFP sensor. **(E-H)** Lateral view of stage 16 *prospero* mutant. In both contexts, associated with deficient formation of SNa, we observe an increase in the Sidestep staining in L-AMPs (white arrowheads). Scale bars represent 20 μm.

Figure S6

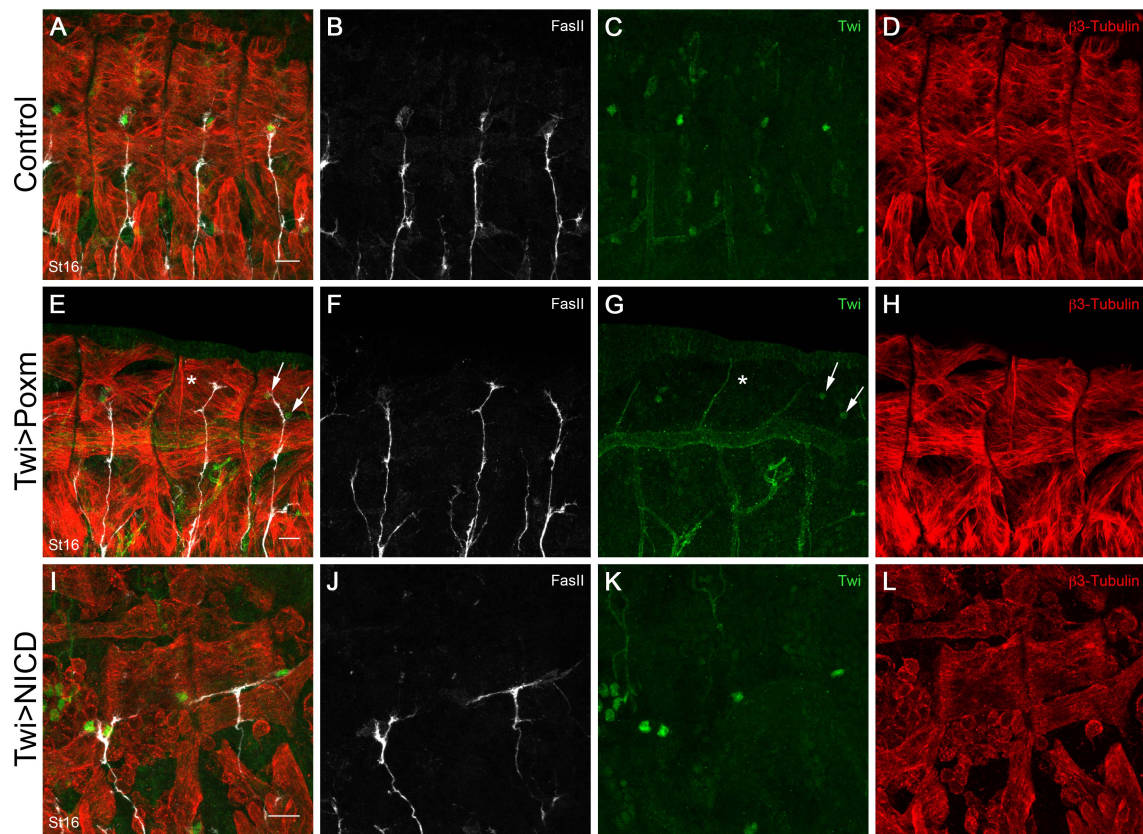

**Figure S6. ISN is attracted by D-AMPs but its dorsal migration is not affected by their absence.** Zoomed dorsal view of Twist-GAL4 (A-D), Twist>Pox meso (E-H) and Twist>NICD (I-L) stage 16 embryos. (E-H) The ectopic expression of Pox meso can induce either the loss of D-AMPs (white asterisk) or their duplication in a given segment (white arrows). The absence of the D-AMPs does not lead to a stall phenotype for the ISN, which can still innervate the most dorsal muscles. In the segment with duplicated D-AMPs, both retain the ability to attract the ISN. (I-L) Pan-mesodermal expression of the Notch intra-cellular domain (NICD) leads to the stochastic disruption of most of the body-wall muscles. Surviving D-AMPs are often mis-localized and are associated with altered ISN trajectory. Scale bars represent 10  $\mu$ m.

Figure S7

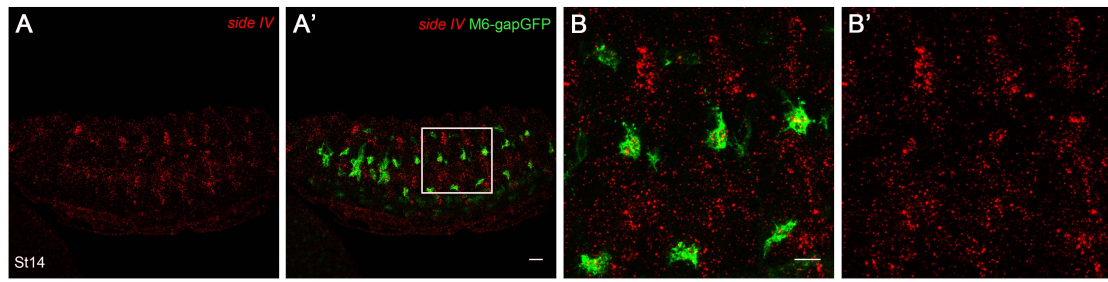

**Figure S7. Embryonic *side IV* expression in L-AMPs.** (A-B') Fluorescent *in situ* hybridization (red) of *side IV* in a stage 14 M6-gapGFP embryo. The zoomed view (B,B') highlights the enrichment of *side IV* transcripts in L-AMPs. Scale bars represent 20  $\mu$ m and 10  $\mu$ m for the zoomed view.

**Table S1. KEY RESOURCES TABLE**

| REAGENT or RESOURCE                                  | SOURCE                                       | IDENTIFIER                |
|------------------------------------------------------|----------------------------------------------|---------------------------|
| <b>Antibodies</b>                                    |                                              |                           |
| Goat polyclonal anti-GFP                             | Abcam                                        | RRID: ab5450              |
| Mouse monoclonal anti-Sidestep                       | Developmental Studies Hybridoma Bank         | 9B8; RRID: AB_528468      |
| Mouse monoclonal anti-Fasciclin 2                    | Developmental Studies Hybridoma Bank         | 1D4; RRID: AB_528235      |
| Rabbit polyclonal anti- $\beta$ 3Tubulin             | Laboratory of Renate Renkawitz-Pohl, Germany | N/A                       |
| Mouse monoclonal anti-Connectin                      | Developmental Studies Hybridoma Bank         | C1.427; RRID: AB_10660830 |
| Phalloidin-TRITC                                     | Sigma-Aldrich                                | RRID: P1951               |
| Guinea-pig polyclonal anti-Twist                     | Laboratory of Robert Zinzen, Germany         | N/A                       |
| <b>Experimental Models: Organisms/Strains</b>        |                                              |                           |
| <i>D. melanogaster</i> : M6-gapGFP                   | Laboratory of Krzysztof Jagla, France        | N/A                       |
| <i>D. melanogaster</i> : <i>prosp</i> <sup>17</sup>  | Bloomington Drosophila Stock Center          | RRID: BDSC_5458           |
| <i>D. melanogaster</i> : <i>beat</i> <sup>C163</sup> | Bloomington Drosophila Stock Center          | RRID: BDSC_4742           |
| <i>D. melanogaster</i> : <i>beat</i> <sup>3</sup>    | Bloomington Drosophila Stock Center          | RRID: BDSC_4748           |
| <i>D. melanogaster</i> : M6-GAL4                     | Laboratory of Krzysztof Jagla, France        | N/A                       |
| <i>D. melanogaster</i> : DUF-GAL4                    | Laboratory of M. Ruiz Gómez, Spain           | N/A                       |
| <i>D. melanogaster</i> : SBM-GAL4                    | Laboratory of A. Michelson                   | N/A                       |
| <i>D. melanogaster</i> : Twist-GAL4                  | Laboratory of Manfred Frasch, Germany        | N/A                       |
| <i>D. melanogaster</i> : UAS-Numb                    | FlyORF                                       | RRID: F003181             |
| <i>D. melanogaster</i> : UAS-NetB                    | Laboratory of Thomas Kidd, USA               | N/A                       |
| <i>D. melanogaster</i> : UAS-Reaper                  | Bloomington Drosophila Stock Center          | RRID: BDSC_5824           |
| <i>D. melanogaster</i> : UAS-LifeActGFP              | Bloomington Drosophila Stock Center          | RRID: BDSC_58718          |
| <i>D. melanogaster</i> : UAS-Poxm                    | Laboratory of Markus Noll, Switzerland       | N/A                       |
| <b>Software and Algorithms</b>                       |                                              |                           |
| Leica Application Suite X                            | Leica Application Suite X                    | RRID: SCR_013673          |
| ImageJ                                               | ImageJ                                       | RRID: SCR_003070          |



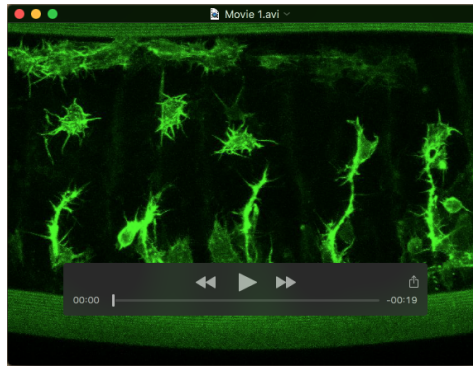

**Movie 1.** *In vivo* imaging of M6-GAL4>UAS-LifeactinGFP stage 15 embryo. A dorso-lateral view of 4 abdominal hemisegments showing interactions of growing ISNs with D-AMPs. In reference to Fig. 1E-H.

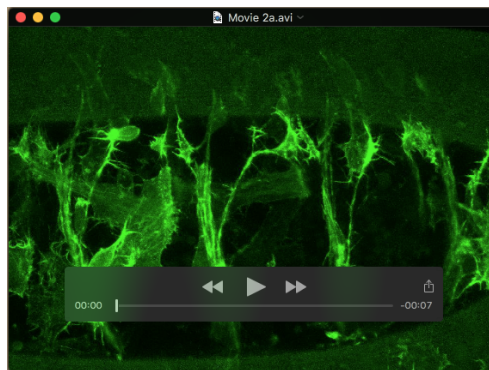

**Movie 2.** *In vivo* imaging of M6-GAL4>UAS-LifeactinGFP stage 15 embryo. A ventro-lateral view of 3 abdominal hemisegments showing lateral branching of growing SNas and interactions with L-AMPs. In reference to Fig. 1I-J.

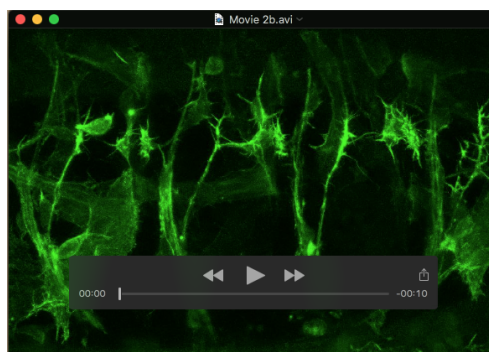

**Movie 3.** *In vivo* imaging of M6-GAL4>UAS-LifeactinGFP stage 15 embryo. A ventro-lateral view of 3 abdominal hemisegments showing lateral branching of growing SNas and interactions with L-AMPs. In reference to Fig. 1K-L.
